# Supplementary material for: Diagnosis and potential invasion risk of Thrips parvispinus under current and future climate change scenarios
Source: PeerJ. 2022 Aug 25;10:e13868. doi: 10.7717/peerj.13868 (PMC9420409; doi:10.7717/peerj.13868)
Supplement: Supplemental Information 4 [file peerj-10-13868-s004.xls]

## Sheet: survey  data
	State	District	Filed location	24th & 25week of December 2021	3rd week week of January 2022	Mean
	AP	Guntur	Chilakaluripet	17	22
			Narasaraopet	18	25
			Krosur	17	19
			Achampet	21	23
				18.25	22.25	20.25
	Telangana	Praksham	Dronadula	11	17
			Budavada	10	16
			Parchoor	12	18
			Pusapadu	11	18
				11	17.25	14.125					Over all Mean
									18.25	22.25	20.25
		Krishna	Kanchikacherla	9	13				11	17.25	14.125
			Nandigama	12	14				11.25	11.75	11.5
			Chandralapadu	12	11				12.25	11.75	12
			Boddapadu	12	9				19	19	19
				11.25	11.75	11.5			7.25	7	7.125
									18.5	19.5	19
		Rajamundry	pandirimamidi	13	11				16.5	21.25	18.875
			Potavarigudam	10	12				10	10.25	10.125
			Rajamundry rural	14	11				8.5	6.25	7.375
			Potavarigudam camp	12	13				6.5	4.5	5.5
				12.25	11.75	12			5.5	4.5	5
									6.25	7.25	6.75
		Khammam	Suryathanda	16	17
			Kusumanchi	18	16
			Pallipadu	23	20
			Enkuru	19	23
				19	19	19
		Kothagudem	Julurpadu	9	6
			Chandrugonda	8	8
			Kothagudem	7	5
			Yerragunta	5	9
				7.25	7	7.125
		Mahabubabad	Danthalapally	18	18
			Dornakal	16	21
			Kuravi	19	20
			Mahabubabad	21	19
				18.5	19.5	19
		Warangal	Girnibavi	17	20
			Narsampet	18	22
			Duggondi	15	22
			Thimmapur	16	21
				16.5	21.25	18.875
	Karnataka	Bellary	Bellary	10	9
			Sirguppa	11	11
			Kampli	8	9
			Tekkalakote	11	12
				10	10.25	10.125
			Koppal	10	6
		Koppal	Gangavati	8	6
			Kustagi	7	5
			Yalburga	9	8
				8.5	6.25	7.375
		Chitradurga	Chitradurga	6	5
			Challakere	8	3
			Molakalmuru	5	5
			Hiriyuru	7	5
				6.5	4.5	5.5
		Gadag	gadag	6	5
			annigeri	6	4
			betageri	5	5
			narsapur	5	4
				5.5	4.5	5
			raichur	6	6
		Raichur	manvi	8	5
			yapaladinni	5	9
			khadgham doddi	6	9
				6.25	7.25	6.75
